# Supplementary material for: Movement Protein Mediates Systemic Necrosis in Tomato Plants with Infection of Tomato Mosaic Virus
Source: MDPI journal article supplement (doi:10.3390/v15010157), 2023-01-04
Supplement: s1 [file s1]

**Table S1. Primers used in vector construction and oligonucleotides for RNA blot**

| Primer name | Primer sequence(5'- 3')                                         | Brief description                           |
|-------------|-----------------------------------------------------------------|---------------------------------------------|
| P1          | GTATTTTACACAATTACCAACAACAAC                                     |                                             |
| P2          | ATCTCTAATGATACTAACTAAAGGATCCATC                                 | pCB301-N5                                   |
| P3          | TGATGGATCCTTTAGTTAGTATCATTAGAGA                                 | pCB301-S1                                   |
| P4          | TGGGCCCCwACCGGGGGT                                              |                                             |
| P5          | AATTCGTTAGGTAACCAGTTTCAAAC                                      |                                             |
| P6          | TTAAGATGCAGGTGCAGAGGTC                                          | pCB301-                                     |
| P7          | gtctgggttggtctgGACCTCTGCACCTGCATCTTAAA                          | -S1 <sup>N5-cp</sup> or N5 <sup>S1-cp</sup> |
| P8          | CGATCGGGGAAATTCGAGC                                             |                                             |
| P9          | ATGGCTCTAGTTGTAAAGGTAAGGTAA                                     |                                             |
| P10         | TGACAAAAACACAAATTGCGATGGAGAAGTGAT<br>TGAGTAAGACcTATTTAATACGAATC |                                             |
| P11         | attcgattaaataggtACGCGTcccgggATGCATAGGTGCyG<br>AAATATAAAGTTTG    | pCB301-Δcp- <i>gfp</i><br><i>p</i>          |
| P8          | CGATCGGGGAAATTCGAGC                                             |                                             |
| P12         | CGacgctATGGTGAGCAAGGGCGAGGAG                                    |                                             |
| P13         | TCCcccgggTACTTGTACAGCTCGTCCATGC                                 |                                             |
| P14         | TCCcccgGGTAGTCAAGATGCATAATAAATAACG                              |                                             |
| P15         | TGGGCGCTACCGGCGGT                                               | pCB301-N5- <i>gfp</i>                       |
| P16         | ccggtagcggcccaGGGTCGGCATGGCATCTC                                | pCB301-S1- <i>gfp</i>                       |
| P8          | CGATCGGGGAAATTCGAGC                                             |                                             |
| P21         | CGgcatccATGGCTCTAGTTGTAAAGGTAAGGTAA                             | pCB301-N5-mp                                |
| P22         | TCCcccgggTTAATACGAATCAGAATCCGCGAC                               | and S1-mp                                   |
| P24         | TCTAGTTGTAAAGGTAAGGTAAATATTAATG                                 | MP mutants of                               |
| P25         | GCAGACACTCACACCACCAC                                            | S1- <i>gfp</i> , N5- <i>gfp</i> ,           |
| P26         | GTGGTGTGAGTGTCTGCWTGGTTGACAAGAGAA<br>TGAAAGAG                   | S1                                          |
| P27         | TATTATTTTATAAACAATACACACAGACACA                                 |                                             |
| P28         | ATTGTTTATAAAAATAATAYAAAATTGGGTTTGAG<br>GGAGAAAGT                |                                             |
| P29         | AAAACTTTTGGTTTAGGCCTTCC                                         |                                             |
| P30         | CCTAAACCAAAAAGTTTTKATGAAGTTGAAAAA<br>GAGTTTGATAATTTG            |                                             |
| P31         | TGTGTTTGAAACTGGTTACCTAACG                                       |                                             |
| P32         | CCGCGCGCTCCAAGACACTACCCTTCGATTAA-D<br>IG                        | ToMV RNAs                                   |
| P33         | GTGTGGACAGGTAATGGTTGTCTGGTAAAAGGAC<br>AGGGC-DIG                 | GFP mRNA                                    |
| P34         | TTGCGTGTGCATCCTTGCGCAGG-DIG                                     | U6 RNA                                      |

---

|        |                                   |                   |
|--------|-----------------------------------|-------------------|
| P35-37 | TCAAGAGCGCCATGCCTGAGGGATACGTGCAGG | <i>GFP</i> -siRNA |
|        | AGA-DIG,                          |                   |
|        | AGGACCATCTTCTTCAAGGACGACGGGAACTAC |                   |
|        | AAGACACG-DIG and                  |                   |
|        | GTGCTGAAGTCAAGTTTGAGGGAGACACCCTCG |                   |
|        | TCAACAG-DIG                       |                   |

---
